# Supplementary material for: LncRNA NALT1 promotes colorectal cancer progression via targeting PEG10 by sponging microRNA-574-5p
Source: PubMed Central journal article supplement (PMC9669023; doi:10.1038/s41419-022-05404-5), 2022-11-16

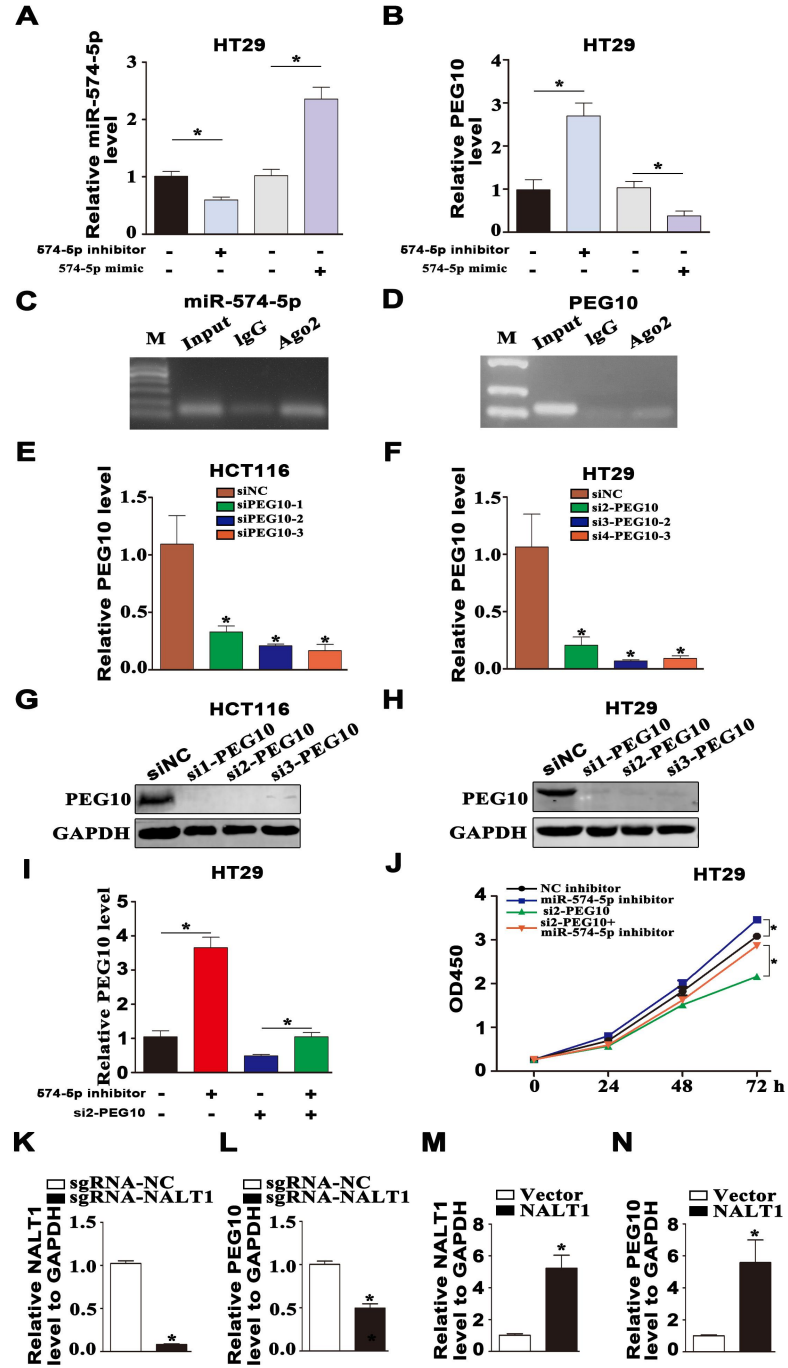

Supplement: 41419_2022_5404_MOESM2_ESM.pdf [file 41419_2022_5404_MOESM2_ESM.pdf]
